# Supplementary material
Source: publisher figshare collection journal article supplement (https://acs.figshare.com/ndownloader/files/12333446)
Supplement: Supplementary file 1 [file 12333446]

## Supporting Information

# Nafion-Mediated Liquid-Phase Exfoliation of Transition Metal Dichalcogenides and Direct Application in Hydrogen Evolution Reaction

Nam Khen Oh,<sup>†</sup> Hoon Ju Lee,<sup>§</sup> Keunsu Choi,<sup>§</sup> Jihyung Seo,<sup>†</sup> Ungsoo Kim,<sup>†</sup> Junghyun Lee,<sup>†</sup>  
Yunseong Choi,<sup>†</sup> Seungon Jung,<sup>†</sup> Jun Hee Lee,<sup>§</sup> Hyeon Suk Shin,<sup>\*,†,§</sup> and Hyesung Park<sup>\*,†</sup>

<sup>†</sup>Department of Energy Engineering, School of Energy and Chemical Engineering, Low Dimensional Carbon Materials Center, Perovtronic Research Center, Ulsan National Institute of Science and Technology (UNIST), Ulsan 44919, Republic of Korea

<sup>‡</sup>Department of Chemistry, School of Natural Science, Low Dimensional Carbon Materials Center, Center for Multidimensional Carbon Materials, Ulsan National Institute of Science and Technology (UNIST), Ulsan 44919, Republic of Korea

<sup>§</sup>Department of Energy Engineering, School of Energy and Chemical Engineering, Ulsan National Institute of Science and Technology (UNIST), Ulsan 44919, Republic of Korea

<sup>\*</sup>Corresponding authors

E-mail address: shin@unist.ac.kr, hspark@unist.ac.kr

## Table of Contents

|                                                                                                                           |           |
|---------------------------------------------------------------------------------------------------------------------------|-----------|
| <b>1. Supporting figures and table.....</b>                                                                               | <b>S2</b> |
| <b>Figure S1</b> Dispersion stability of the $N$ -MoS <sub>2</sub> .....                                                  | S2        |
| <b>Figure S2</b> STEM-EDS elemental mapping of $N_2$ -MoS <sub>2</sub> .....                                              | S3        |
| <b>Figure S3</b> Histogram of thickness distribution of $N_x$ -MoS <sub>2</sub> ( $x$ is 0.2, 1, 3, 4, 5, and 6 mL) ..... | S4        |
| <b>Figure S4</b> HRTEM images of $N_x$ -MoS <sub>2</sub> ( $x$ is 1, 2, 3, and 4 mL) .....                                | S5        |
| <b>Figure S5</b> Distribution of Nafion cluster size with varying Nafion concentrations .....                             | S6        |
| <b>Figure S6</b> Optical analysis of MoS <sub>2</sub> in IPA, ACN, and $N_2$ -MoS <sub>2</sub> .....                      | S7        |
| <b>Figure S7</b> Histogram of thickness distribution in MoS <sub>2</sub> exfoliated from IPA and ACN .....                | S8        |
| <b>Table S1</b> Summary of HER performance of MoS <sub>2</sub> exfoliated from various solvents .....                     | S9        |

## 1. Supporting figures and table

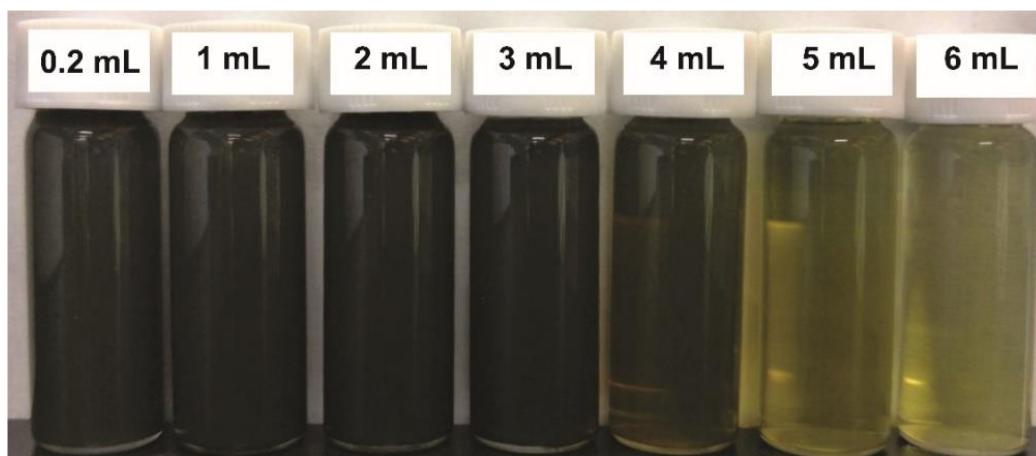

**Figure S1.** Photograph of the *N*-MoS<sub>2</sub> dispersion after 300 days of storage in ambient condition.

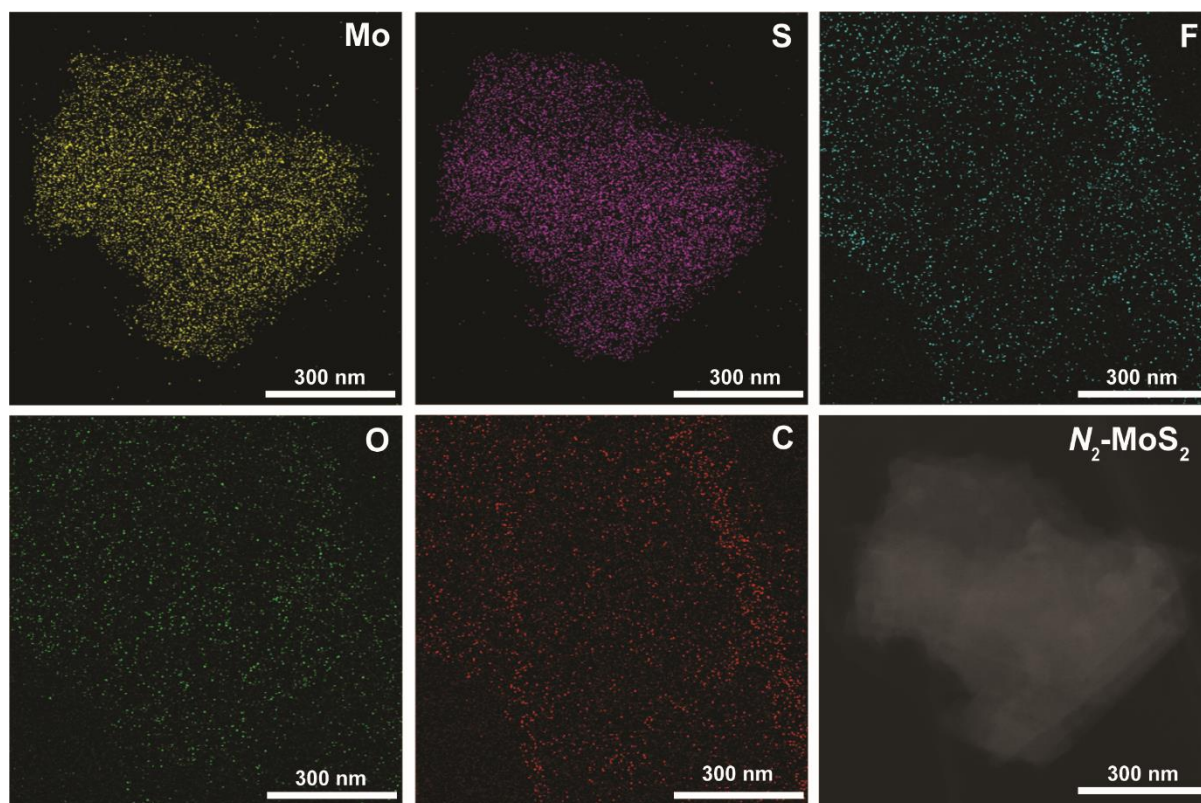

**Figure S2.** STEM-EDS Elemental mapping images of Mo, S, F, O, and C from  $N_2$ -MoS<sub>2</sub>.

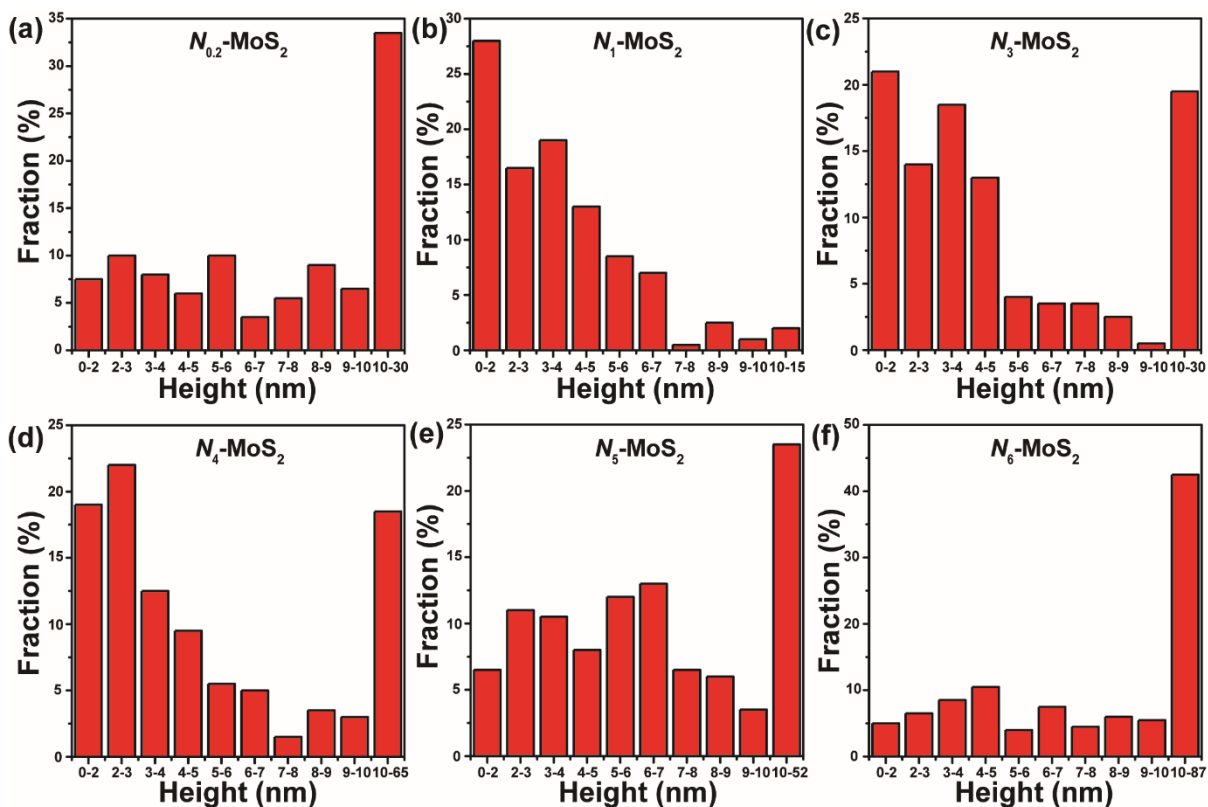

**Figure S3.** Histograms of thickness distribution in  $N_x\text{-MoS}_2$  ( $x$  = volume of Nafion in mL) measured from over 200 individual flakes with varying Nafion concentrations ((a)  $x$  = 0.2, (b)  $x$  = 1, (c)  $x$  = 3, (d)  $x$  = 4, (e)  $x$  = 5, and (f)  $x$  = 6 mL).

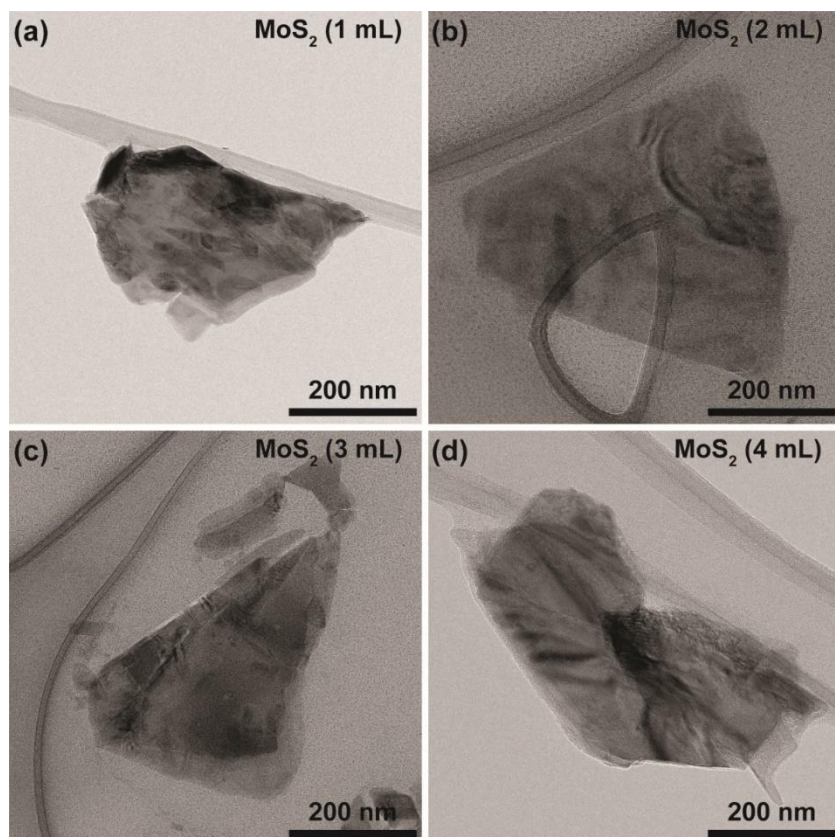

**Figure S4.** TEM images of  $N_x$ -MoS<sub>2</sub> flakes with various Nafion concentrations ((a)  $x = 1$ , (b)  $x = 2$ , (c)  $x = 3$ , and (d)  $x = 4$  mL) showing exfoliated MoS<sub>2</sub> flakes in lateral size of several hundred-nanometer with thickness of few-layer range.

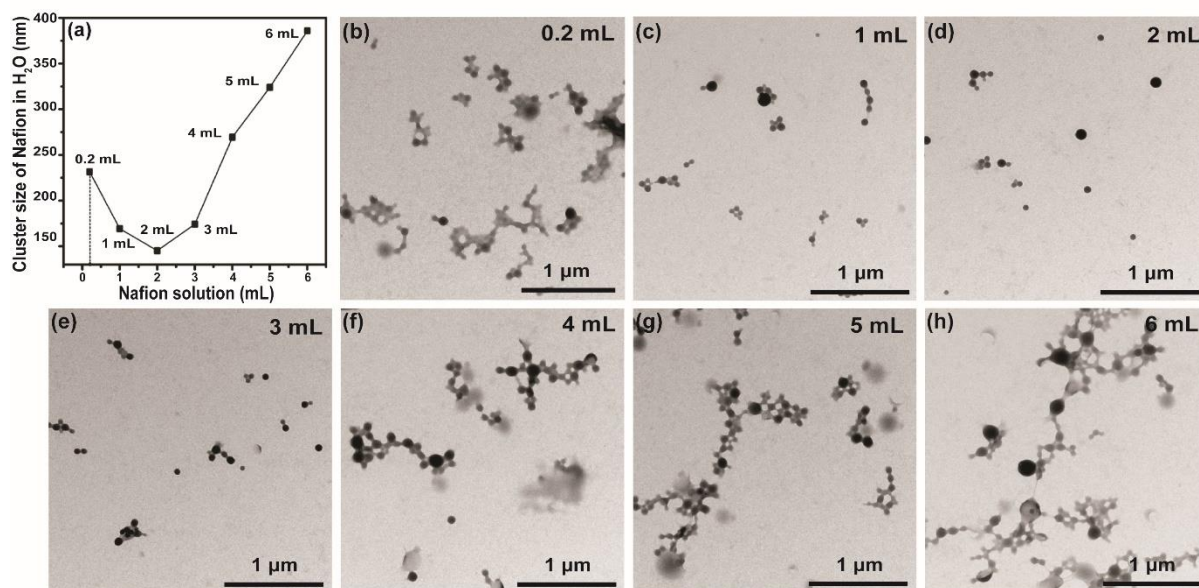

**Figure S5.** Distribution of Nafion cluster size with varying Nafion concentrations. (a) Average size of Nafion clusters obtained from DLS analysis and corresponding (b-h) FETEM images.

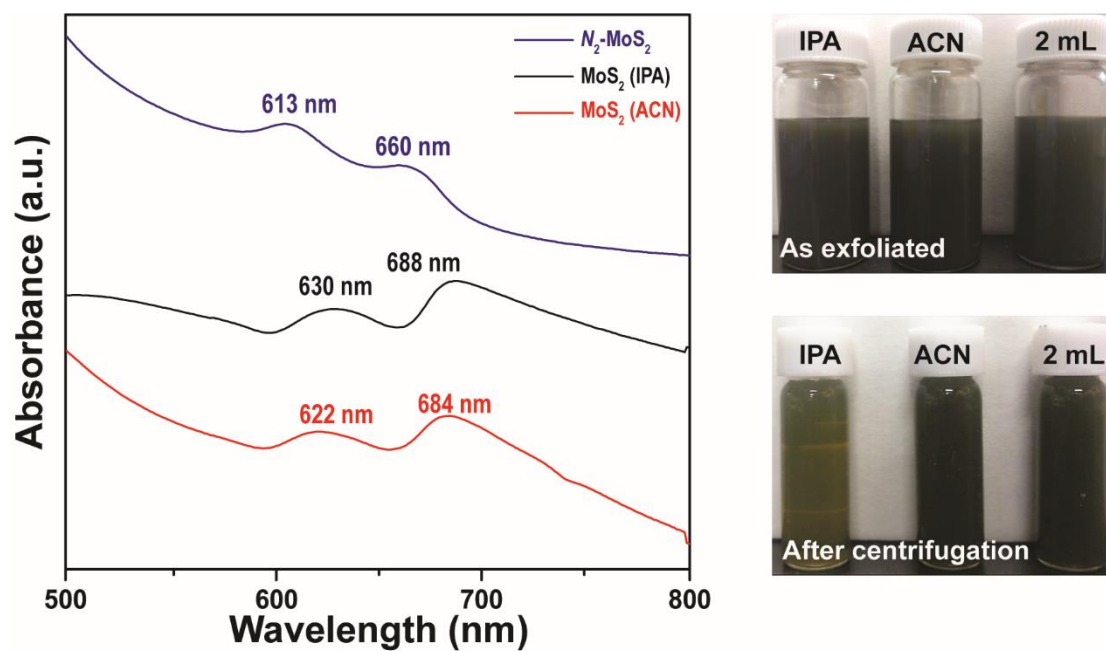

**Figure S6.** Optical absorption spectra of MoS<sub>2</sub> flakes exfoliated from IPA and ACN solutions compared with that of  $N_2$ -MoS<sub>2</sub>, and digital images of the corresponding MoS<sub>2</sub> dispersion before and after the centrifugation.



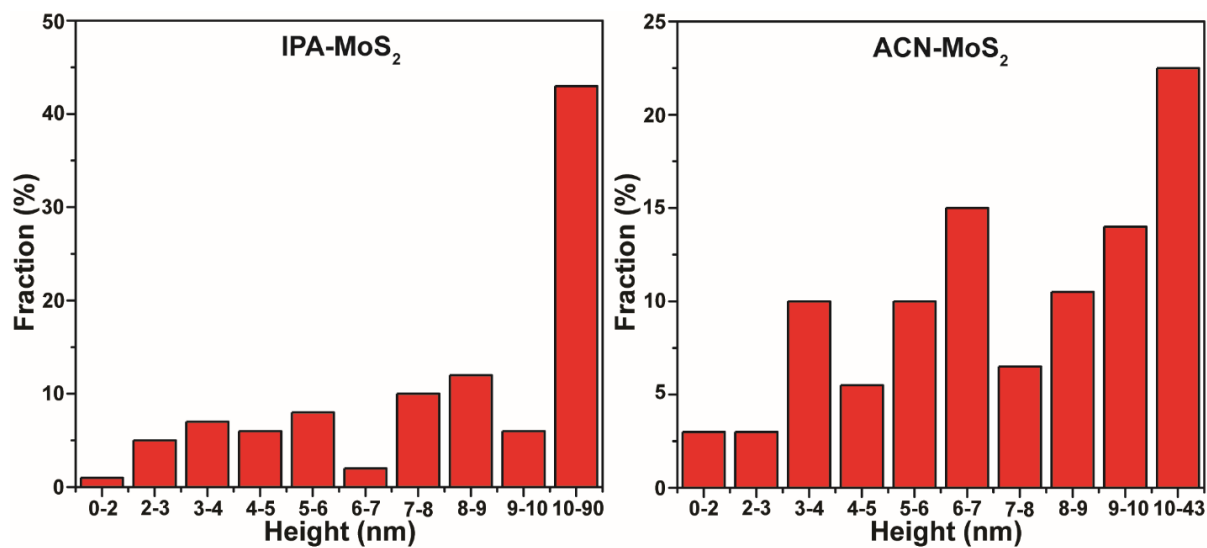

**Figure S7.** Histograms of thickness distribution in MoS<sub>2</sub> flakes exfoliated from IPA and ACN solutions, which is measured from over 200 individual flakes.

**Table S1.** Summary of overpotential and Tafel slope of  $N_x$ -MoS<sub>2</sub> from Figure 6. ‘–’ denotes the overpotential which cannot be defined for the given voltage range measurement.

| Catalyst ( $N_x$ -MoS <sub>2</sub> ) | Overpotential @ 10 mA cm <sup>-2</sup><br>(mV, $\eta_{10}$ ) | Tafel slope (mV/dec) |
|--------------------------------------|--------------------------------------------------------------|----------------------|
| $N_{0.2}$ -MoS <sub>2</sub>          | –                                                            | 125                  |
| $N_1$ -MoS <sub>2</sub>              | 658                                                          | 113                  |
| $N_2$ -MoS <sub>2</sub>              | 609                                                          | 106                  |
| $N_3$ -MoS <sub>2</sub>              | 660                                                          | 112                  |
| $N_4$ -MoS <sub>2</sub>              | 734                                                          | 118                  |
| $N_5$ -MoS <sub>2</sub>              | 745                                                          | 120                  |
| $N_6$ -MoS <sub>2</sub>              | 745                                                          | 120                  |
| IPA-MoS <sub>2</sub>                 | –                                                            | 183                  |
| ACN-MoS <sub>2</sub>                 | –                                                            | 163                  |
| Pt/C                                 | 42                                                           | 39                   |
